# Supplementary material for: The Pathophysiological Changes and Clinical Effects of Tetramethylpyrazine in ICR Mice with Fluoride-Induced Hepatopathy
Source: MDPI journal article supplement (doi:10.3390/molecules28124849), 2023-06-19
Supplement: s1 [file s1]

**Table S1.** qRT-PCR Primer Sequence Listing.

| Gene           | Accession number | Primer sequence (5'-3' )                          | Product length(bp) |
|----------------|------------------|---------------------------------------------------|--------------------|
| Nrf2           | NM-010902.4      | F: AGCGGTAGTATCAGCCAR:<br>GCCCAGTCCCTCAATAGC      | 150                |
| HO-1           | NM-010442.2      | F: TGTTGCGCTCTATCTCCR:<br>GTACACATCCAAGCCGAG      | 136                |
| CAT            | NM-009804.2      | F: TTCCTGAGCAAGCCTTCR:<br>CACATGAATGGCTATGGATCACA | 138                |
| GSH-Px         | NM-008160.6      | F: TCTCTTCATTCTTGCCATR:<br>GACTACACCGAGATGAACGA   | 112                |
| SOD1           | NM-011434.2      | F: CACCTTTGCCCAAGTCAR:<br>TCCATTGAAGATCGTGT       | 97                 |
| $\beta$ -Actin | NM-007393        | F: CGCTCGTTGCCAATAGTGR:<br>GCTGTGCTATGTTGCTCTAG   | 117                |
